# Supplementary material for: О бифуркациях динамических систем коразмерности два с негрубой гомоклинической структурой седло узел
Source: Royal Society of Chemistry journal article supplement (doi:10.1039/c9cc06388a), 2007-01-01
Supplement: c9cc06388a1.pdf [file c9cc06388a1.pdf]

## Supporting Information

for

### Zinc as a Versatile Connecting Atom for Zintl Cluster Oligomers

Kerstin Mayer,<sup>a</sup> Wilhelm Klein,<sup>a</sup> and Thomas F. Fässler<sup>a</sup>

1. Experimental Details
2. Determination of Cluster Geometry
3. NMR Spectra
4. ESI-MS Spectra
5. Selected Bond Lengths
6. Mixed Supporting Information of Compound **2**

1. Experimental Details

**General.** All reactions and manipulations were performed under a purified argon atmosphere using standard Schlenk and glove box techniques. The Zintl compound of nominal composition  $K_4Ge_9$  was synthesized by heating (2 K/min) of a stoichiometric mixture of the elements K (Merck,  $\geq 98\%$ ) and Ge (99.999% Chempur) at 650 °C in a stainless-steel autoclave for 46 h and slow cooling (1 K/min) to room temperature. Toluene was dried over molecular sieve (4 Å) and thf over a special drying material in a solvent purificator (MBraun MB-SPS). Liquid ammonia was stored over sodium metal and freshly distilled before use. 2.2.2-Crypt (Merck) was dried for 8 h *in vacuo*. The bis-silylated  $Ge_9$  cluster  $K_2[Ge_9\{Si(SiMe_3)_3\}_2]$  and the zinc complexes  $ZnCp^*_2$  and  $Zn_2[HC(Ph_2P=NPh)_2]$  were prepared according to the literature.<sup>1-3</sup>

**Energy Dispersive X-Ray (EDX) Analysis.** Single crystals of compounds **1** and **2** were analyzed with a scanning electron microscope equipped with an energy dispersive X-ray analyzer (Hitachi TM-1000 Tabletop microscope).

**NMR Spectroscopy.**  $^1H$ ,  $^{13}C$  and  $^{29}Si$  NMR spectra were recorded on a Bruker AVIII 400 FT system (Bruker Corp.) at 300 K. The chemical shifts are given in  $\delta$  values (ppm). The signals of the  $^1H$  and  $^{13}C$  spectra were calibrated on the rest proton signal of the used deuterated solvents thf- $d_8$  and benzene- $d_6$ . Signal multiplicities are abbreviated as follows: s - singlet. The spectra were evaluated with MestReNova.<sup>4</sup>

**Single-Crystal Structure Determination.** Single crystals were fixed on a glass fiber with perfluorinated ether and positioned in a 150 K cold N<sub>2</sub> stream. For single crystal X-ray diffraction data collection, a STOE StadiVari diffractometer (Mo-K<sub>α</sub> radiation) was used. The structures were solved by Direct Methods and refined by full-matrix least-squares calculations against  $F^2$  using SHELX-2014.<sup>5</sup> Non-hydrogen atoms were treated with anisotropic displacement parameters. For compound **1** the total amount of solvent molecules was determined by using the Squeeze function.<sup>6</sup> For compounds **1** and **2** several C and N atoms had to be treated with the ISOR command. Table 1 contains selected crystallographic data and refinement details of the crystal structures. Pictures of the crystal structures were created with the program Diamond.<sup>7</sup>

Table 1: Selected crystallographic data of the crystal structures of **1** and **2**.

| Compound                                         | <b>1</b>                                                                              | <b>2</b>                                                        |
|--------------------------------------------------|---------------------------------------------------------------------------------------|-----------------------------------------------------------------|
| formula                                          | C <sub>114</sub> H <sub>264</sub> Ge <sub>36</sub> K <sub>6</sub> Si <sub>32</sub> Zn | Ge <sub>9</sub> H <sub>51</sub> N <sub>17</sub> Zn <sub>2</sub> |
| fw (g·mol <sup>-1</sup> )                        | 5447.33                                                                               | 1073.62                                                         |
| space group (No.)                                | $P\bar{1}$ (2)                                                                        | $P2_1/m$ (11)                                                   |
| <i>a</i> (Å)                                     | 16.0588(5)                                                                            | 10.355(2)                                                       |
| <i>b</i> (Å)                                     | 22.0076(6)                                                                            | 17.830(4)                                                       |
| <i>c</i> (Å)                                     | 37.9459(12)                                                                           | 10.478(2)                                                       |
| $\alpha$ (deg)                                   | 85.691(2)                                                                             | 90                                                              |
| $\beta$ (deg)                                    | 88.100(2)                                                                             | 113.42(3)                                                       |
| $\gamma$ (deg)                                   | 70.120(2)                                                                             | 90                                                              |
| <i>V</i> (Å <sup>3</sup> )                       | 12575.1(7)                                                                            | 1775.2(7)                                                       |
| <i>Z</i>                                         | 2                                                                                     | 2                                                               |
| T (K)                                            | 150(2)                                                                                | 150(2)                                                          |
| $\lambda$ (Å)                                    | 0.71073                                                                               | 0.71073                                                         |
| $\rho_{\text{calcd}}$ (g·cm <sup>-3</sup> )      | 1.439                                                                                 | 2.009                                                           |
| $\mu$ (mm <sup>-1</sup> )                        | 4.600                                                                                 | 8.845                                                           |
| collected reflections                            | 251052                                                                                | 15020                                                           |
| independent reflections                          | 49399                                                                                 | 3595                                                            |
| $R_{\text{int}}$                                 | 0.0924                                                                                | 0.0566                                                          |
| parameters / restraints                          | 1801 / 126                                                                            | 144 / 18                                                        |
| $R_1$ [ $I > 2 \sigma(I)$ / all data]            | 0.0573 / 0.0945                                                                       | 0.0612 / 0.0733                                                 |
| $wR_2$ [all data / $I > 2 \sigma(I)$ ]           | 0.1363 / 0.1524                                                                       | 0.1624 / 0.1751                                                 |
| goodness of fit                                  | 1.083                                                                                 | 1.076                                                           |
| max./min. diff. el. Density (e·Å <sup>-3</sup> ) | 1.02 / -1.19                                                                          | 0.76 / -0.75                                                    |
| CCDC No.                                         | 1946668                                                                               | 1946669                                                         |

**Electron Spray Mass Spectrometry (ESI-MS).** The preparation of the samples for ESI-MS measurements was performed in a glove box. The solutions were diluted with thf to a concentration of approx.  $2.0 \cdot 10^{-4}$  mmol/mL. The measurements were performed on an HCT instrument (*Bruker Corp.*). Analysis of the data was performed using the program Bruker Compass Data Analysis 4.0 SP 5 (*Bruker Corp.*). The dry gas temperature was adjusted at 125 °C and the injection speed at 240  $\mu$ L/h. Visualization of the spectra was carried out with the programs OriginPro 2015G (*Origin Lab Corp.*) and

Excel 2015 (Microsoft Corp.). All observed compounds must bear a single negative charge, due to measurements circumstances, despite of their reasonable charge.

**Synthesis of  $K_6[Zn\{\eta^1-Ge_9(Hyp)_2\}_4] \cdot 10.5 \text{ tol}$  (1).** 120 mg (96  $\mu\text{mol}$ , 1 equiv.) of  $[Ge_9(Hyp)_2]^{2-}$  and 32 mg (96  $\mu\text{mol}$ , 1 equiv.)  $ZnCp^*_2$  were dissolved in 3 mL of thf. The brownish suspension was stirred overnight. After removal of the solvent, the residue was dissolved in 3 mL of toluene and filtrated. The volume of the brownish-red solution was reduced to approx. 1 mL, and the solution was stored at  $-32\text{ }^\circ\text{C}$ . After 5 weeks red columns (approx. 5% yield) suitable for single crystal diffractometry were obtained. EDX results: Zn:K:Si:Ge = 1:9.8:28.5:32.8 (calc. 1:6:32:36).

*NMR Spectra of  $K[ZnCp^*[Ge_9(Hyp)_2]]$ :*  $^1\text{H-NMR}$  (400 MHz, thf- $d_8$ , 300 K):  $\delta$  (ppm) = 1.95 (s, 15 H,  $ZnCp^*$ ), 0.20 (s, 54 H,  $CH_3$ );  $^{13}\text{C-NMR}$  (101 MHz, thf- $d_8$ , 300 K):  $\delta$  (ppm) = 110.4 ( $ZnCp^*$ ), 11.5 ( $ZnCp^*$ ), 3.2 ppm ( $CH_3$ );  $^{29}\text{Si-NMR}$  (79 MHz, thf- $d_8$ , 300 K):  $\delta$  =  $-9.8$  ( $Si(SiMe_3)_3$ ),  $-106.6$  ppm ( $Si(SiMe_3)_3$ ); ESI-MS (negative mode, 4000 V):  $\{ZnCp^*[Ge_9(Hyp)_2]\}^-$  ( $m/z = 1349.8$ ),  $\{Zn[Ge_9(Hyp)_3]\}^-$  ( $m/z = 1462.6$ ),  $\{Zn_2[Ge_9(Hyp)_3]\}^-$  ( $m/z = 1462.6$ ).

**Synthesis of  $(NH_3)_3Zn-Ge_9-Zn(NH_3)_3 \cdot 11 NH_3$  (2).** 30 mg (37  $\mu\text{mol}$ , 1 equiv.)  $K_4Ge_9$ , 95 mg (75  $\mu\text{mol}$ , 3.9 equiv.)  $Zn_2[HC(Ph_2P=NPh)_2]_2$  and 51 mg (135  $\mu\text{mol}$ , 3.6 equiv.) 2.2.2-crypt were weighed out in a Schlenk tube. Approximately 2 mL of liquid ammonia were added, and a brownish-red suspension was formed. After 19 months at  $-77\text{ }^\circ\text{C}$  grey block-shaped crystals (approx. 20% yield) suitable for single crystal diffractometry were obtained. EDX results: Zn:Ge = 1:4.3 (calc. 1:4.5).

## 2. Determination of Cluster Geometry

The nine atomic clusters  $E_9$  adopt several different geometric shapes with two border cases: a tricapped trigonal prism with  $D_{3h}$  symmetry and a monocapped square antiprism with  $C_{4v}$  symmetry (Figure S1). An ideal  $D_{3h}$  is distinguished by three identical heights  $h$  and three identical dihedral angles  $\alpha$ . A distortion of the trigonal prism by elongation of the heights affects its symmetry. With two identical prism heights, two conformers with  $C_{2v}$  symmetry are obtained. Three different heights result in  $C_s$  symmetry. With a dihedral angle of  $0^\circ$  and one height identical with the diagonal  $d$  of the square antiprism the cluster possesses  $C_{4v}$  symmetry.<sup>8</sup>

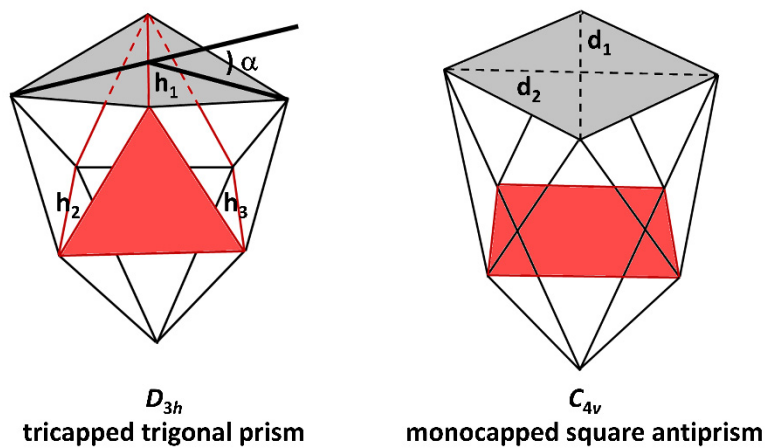

Figure S1: Schematic illustration of the tricapped trigonal prism (left) and the monocapped square antiprism (right) with highlighted geometric parameters.

### 3. NMR Spectra

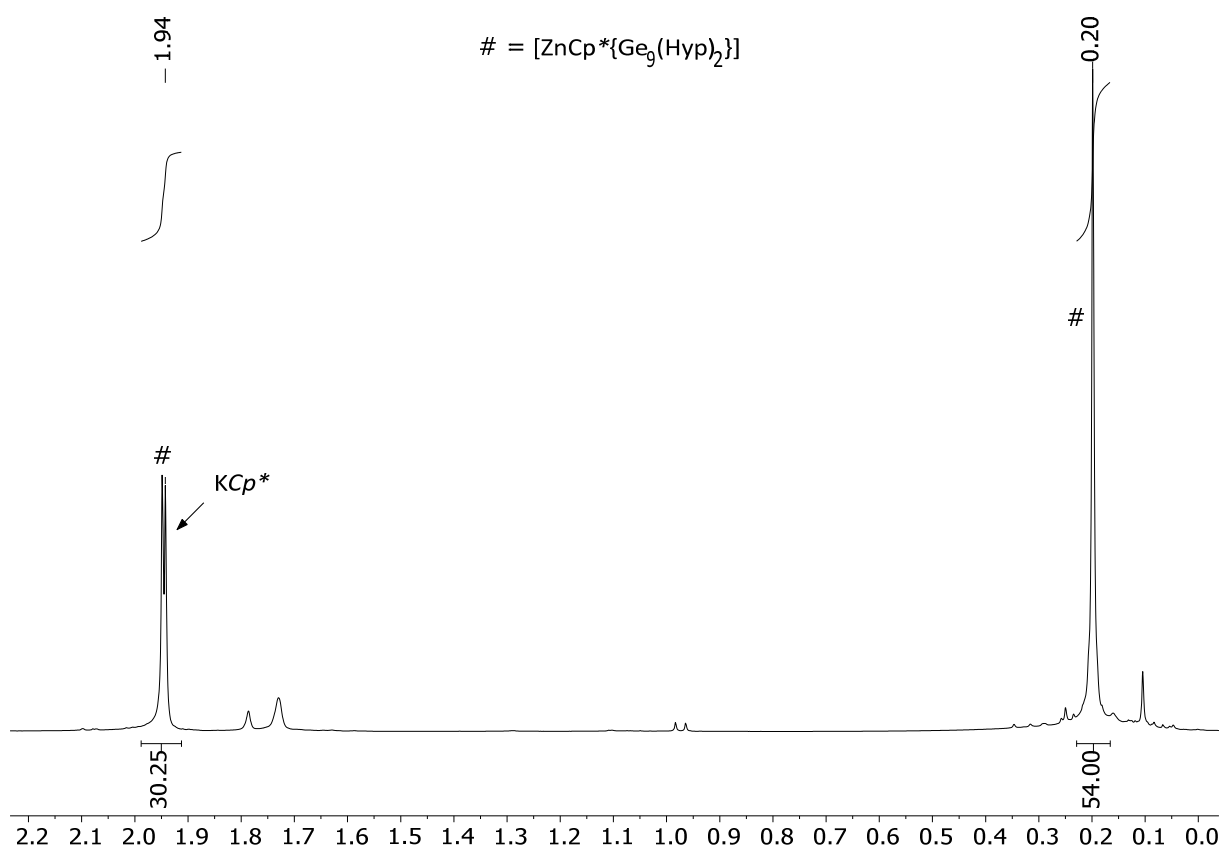

Figure S2:  $^1\text{H}$  NMR spectrum of  $\text{ZnCp}^*_2$  and  $\text{K}_2[\text{Ge}_9(\text{Hyp})_2]$  with the postulated product  $\text{K}[\text{ZnCp}^*\{\text{Ge}_9(\text{Hyp})_2\}]$  in  $\text{thf-d}_8$ .

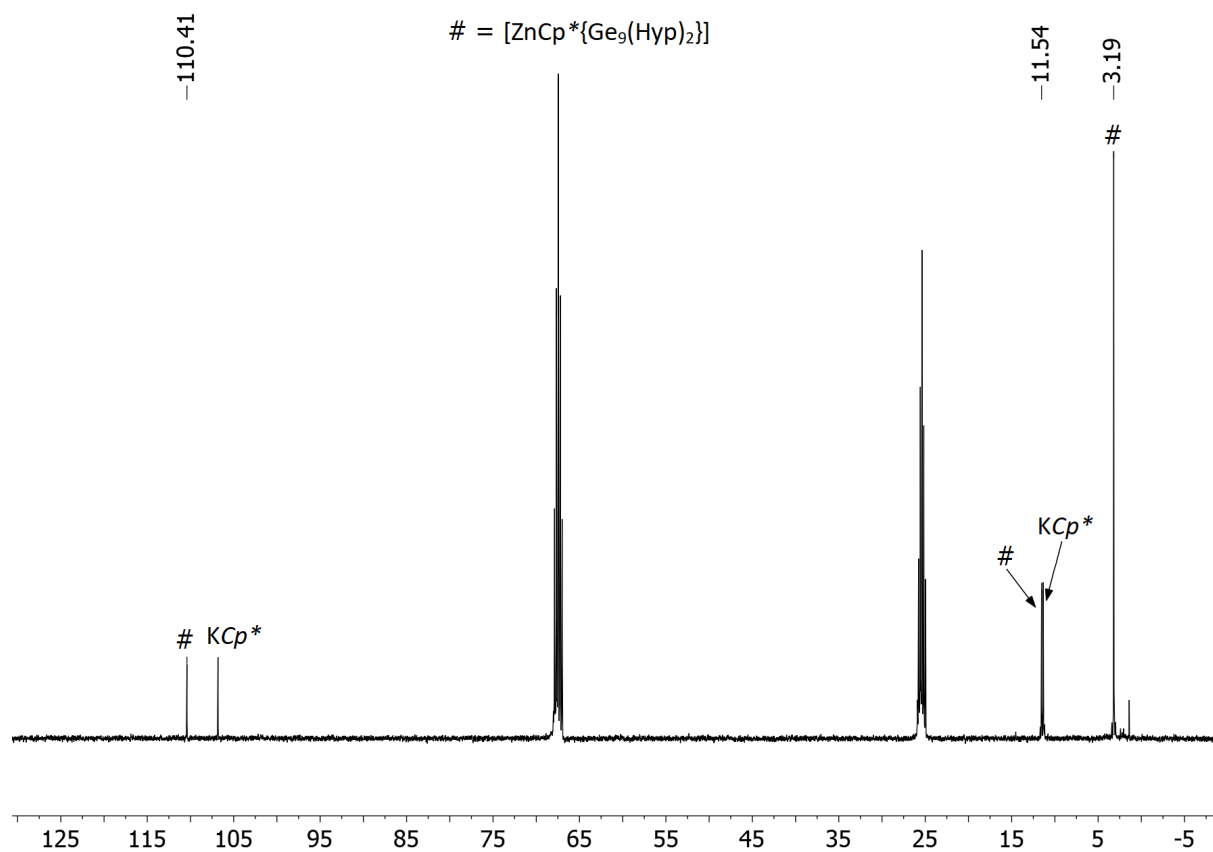

Figure S3:  $^{13}\text{C}$  NMR spectrum of  $\text{ZnCp}^*_2$  and  $\text{K}_2[\text{Ge}_9(\text{Hyp})_2]$  with the postulated product  $\text{K}[\text{ZnCp}^*\{\text{Ge}_9(\text{Hyp})_2\}]$  in  $\text{thf-d}_8$ .

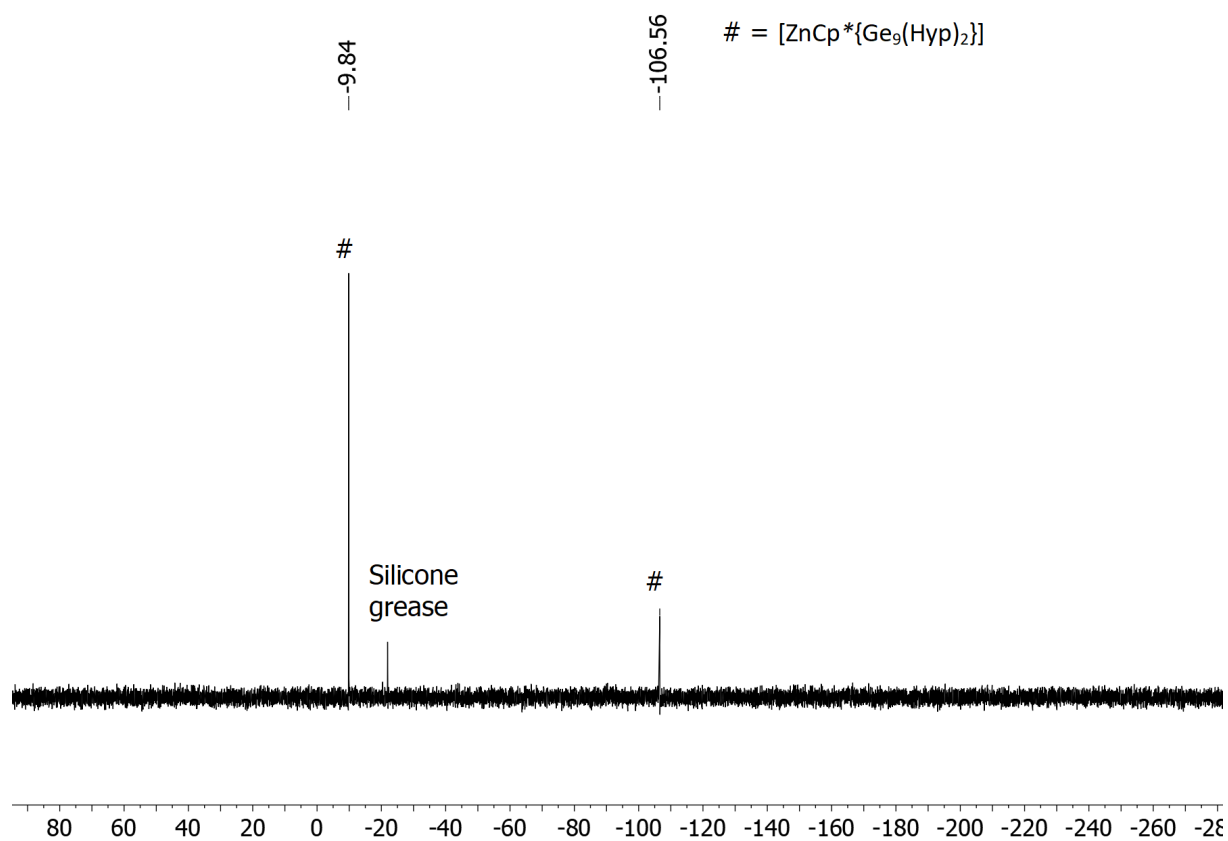

Figure S4:  $^{29}\text{Si}$  NMR spectrum of  $\text{ZnCp}^*_2$  and  $\text{K}_2[\text{Ge}_9(\text{Hyp})_2]$  with the postulated product  $\text{K}[\text{ZnCp}^*\{\text{Ge}_9(\text{Hyp})_2\}]$  in  $\text{thf-d}_8$ .

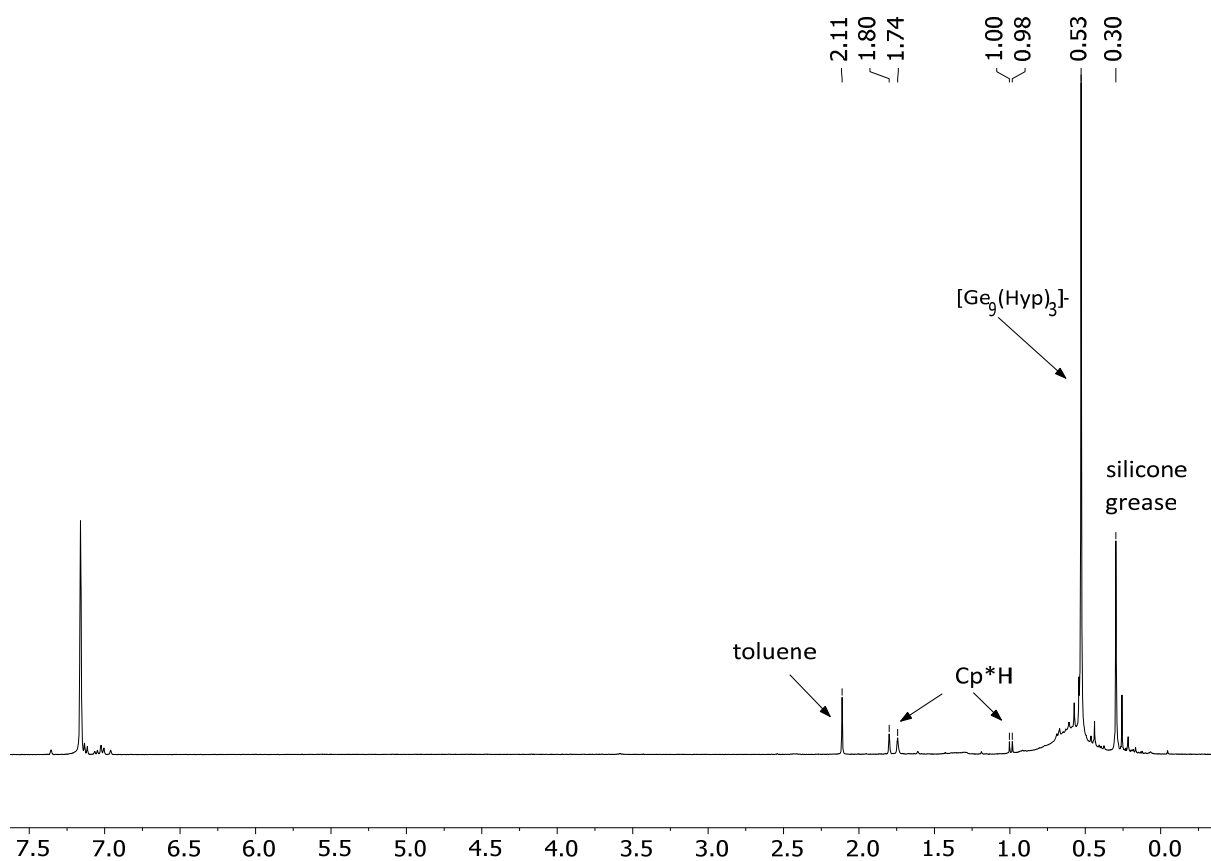

Figure S5:  $^1\text{H}$  NMR spectrum of the brownish solution from the attempt to dissolve the crystal residue of compound **1** in  $\text{C}_6\text{D}_6$ .

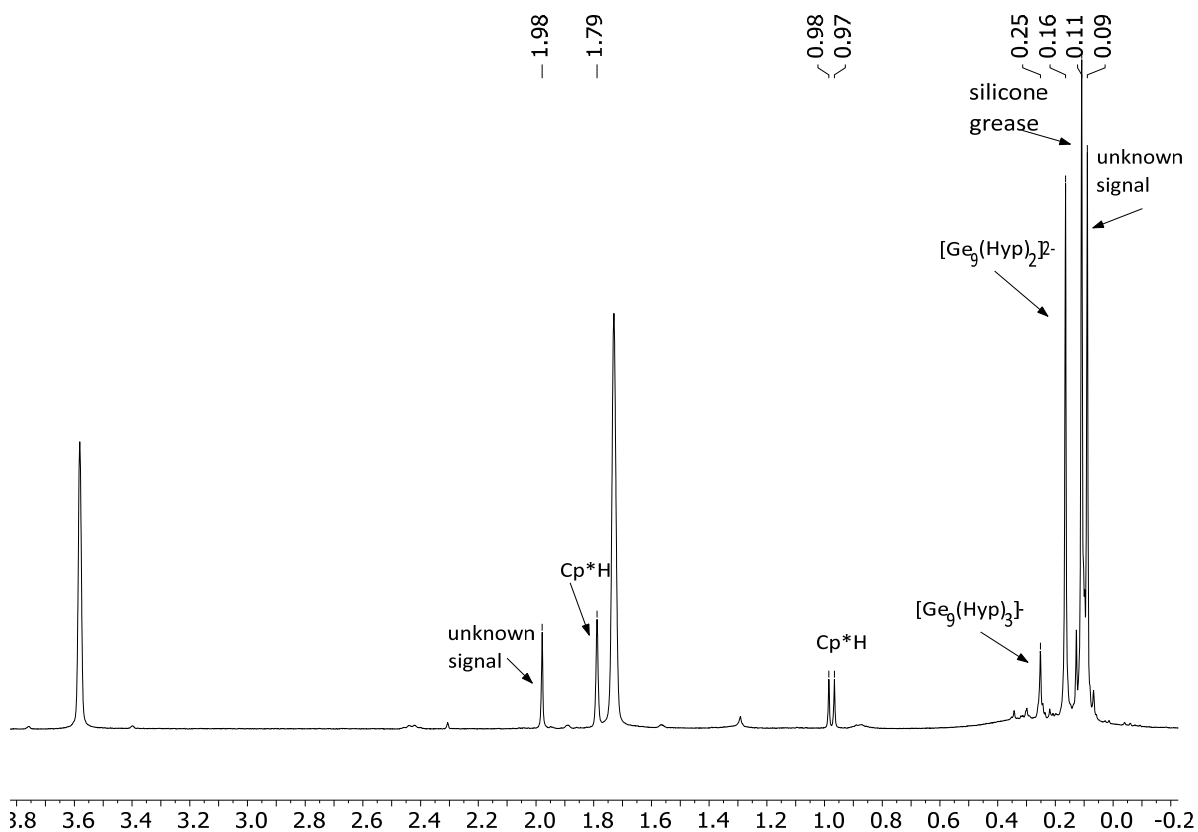

Figure S6:  $^1\text{H}$  NMR spectrum of the brownish solution from the attempt to dissolve the crystal residue of compound **1** in  $\text{thf-d}_8$ .

#### 4. ESI-MS Spectra

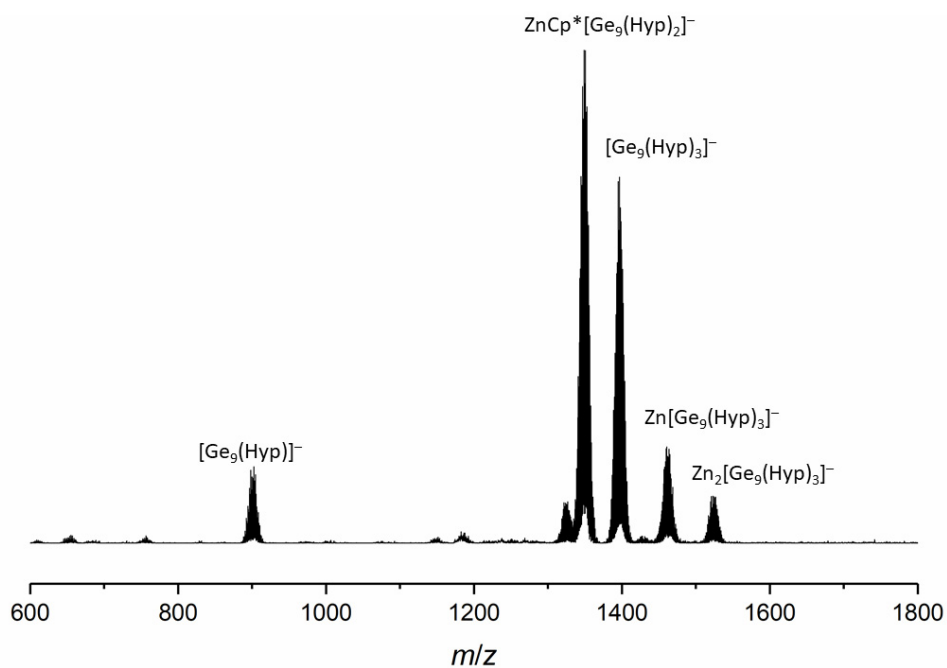

Figure S7: Overview mass spectrum of a thf solution of  $\text{ZnCp}^*_2$  and  $\text{K}_2[\text{Ge}_9(\text{Hyp})_2]$ .

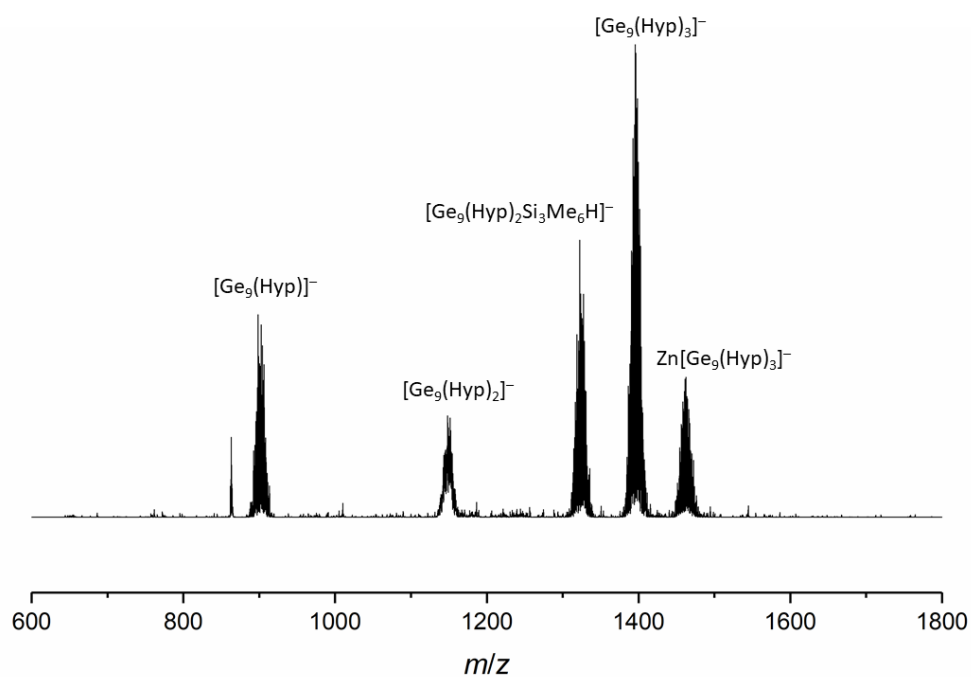

Figure S8: Overview mass spectrum of a toluene solution of  $\text{ZnCp}^*_2$  and  $\text{K}_2[\text{Ge}_9(\text{Hyp})_2]$ .

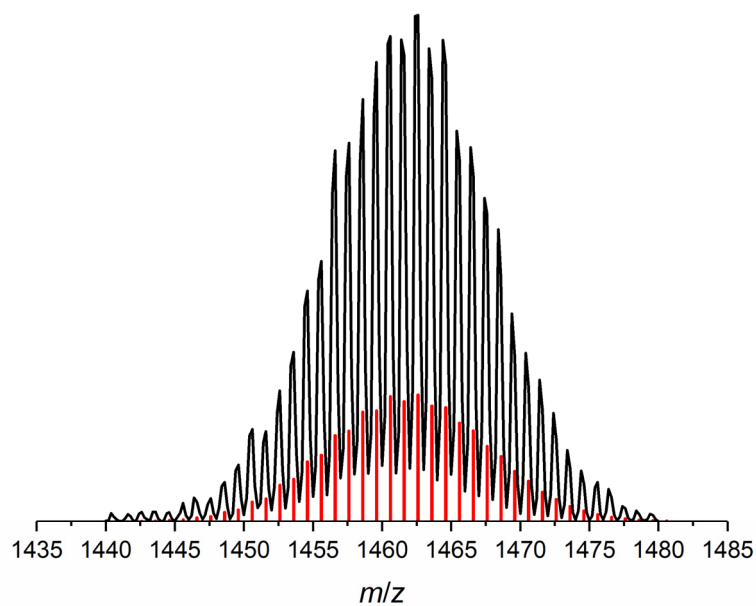

Figure S9: Details of the mass spectrum of  $\text{Zn}[\text{Ge}_9(\text{Hyp})_3]^-$ .

### 5. Selected Bond lengths

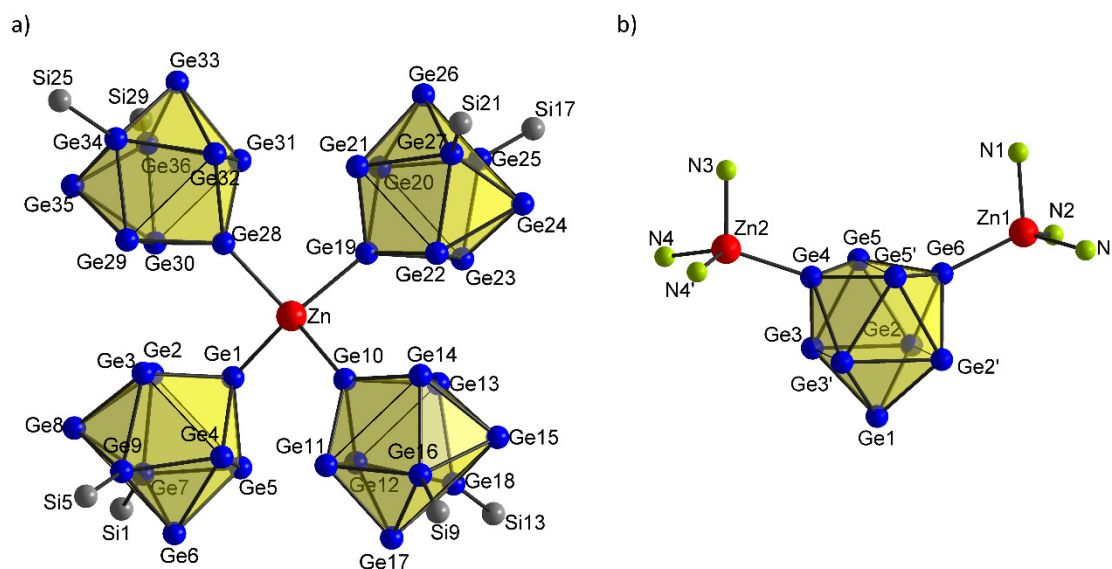

Figure S10: Atom labelling for selected bond lengths in compound **1** (a) and **2** (b), with Ge atoms in blue, Zn atoms in red, Si atoms in grey and N atoms in green. Ge clusters are shown as yellow polyhedra.



Table S2: Selected bond lengths of  $K_6[Zn\{\eta^1\text{-Ge}_9(\text{Hyp})_2\}_4] \cdot 10.5 \text{ Tol (1)}$ .

| Cluster 1 |            | Cluster 3 |            |
|-----------|------------|-----------|------------|
| Ge1 Zn    | 2.5019(9)  | Ge19 Zn   | 2.5538(10) |
| Ge1 Ge2   | 2.5440(10) | Ge19 Ge20 | 2.5578(10) |
| Ge1 Ge3   | 2.5771(11) | Ge19 Ge21 | 2.5753(9)  |
| Ge1 Ge4   | 2.5741(10) | Ge19 Ge22 | 2.5900(10) |
| Ge1 Ge5   | 2.5390(9)  | Ge19 Ge23 | 2.5446(11) |
| Ge2 Ge3   | 2.7344(10) | Ge20 Ge21 | 2.7105(10) |
| Ge2 Ge7   | 2.5662(9)  | Ge20 Ge26 | 2.6817(9)  |
| Ge2 Ge8   | 2.6602(11) | Ge20 Ge25 | 2.5663(11) |
| Ge3 Ge4   | 2.9334(10) | Ge21 Ge26 | 2.6799(10) |
| Ge3 Ge8   | 2.7455(9)  | Ge21 Ge27 | 2.5645(10) |
| Ge3 Ge9   | 2.5661(9)  | Ge22 Ge23 | 2.7207(10) |
| Ge4 Ge5   | 2.7363(10) | Ge22 Ge24 | 2.6719(10) |
| Ge4 Ge6   | 2.7359(9)  | Ge22 Ge27 | 2.5777(9)  |
| Ge4 Ge9   | 2.5631(10) | Ge23 Ge24 | 2.5757(14) |
| Ge5 Ge6   | 2.6402(10) | Ge23 Ge25 | 2.5759(9)  |
| Ge5 Ge7   | 2.5776(11) | Ge24 Ge25 | 2.5264(10) |
| Ge6 Ge7   | 2.5276(10) | Ge24 Ge27 | 2.5292(11) |
| Ge6 Ge9   | 2.5242(10) | Ge25 Ge26 | 2.5290(10) |
| Ge7 Ge8   | 2.5250(11) | Ge26 Ge27 | 2.5311(10) |
| Ge8 Ge9   | 2.5189(10) |           |            |
| Ge7 Si1   | 2.3826(19) | Ge25 Si17 | 2.377(2)   |
| Ge9 Si5   | 2.389(2)   | Ge27 Si21 | 2.3889(19) |
| Cluster 2 |            | Cluster 4 |            |
| Ge10 Zn   | 2.4922(10) | Ge28 Zn   | 2.5705(10) |
| Ge10 Ge11 | 2.5308(10) | Ge28 Ge29 | 2.5489(11) |
| Ge10 Ge12 | 2.5670(9)  | Ge28 Ge30 | 2.5851(10) |
| Ge10 Ge13 | 2.5799(10) | Ge28 Ge31 | 2.5896(10) |
| Ge10 Ge14 | 2.5417(9)  | Ge28 Ge32 | 2.5608(9)  |
| Ge11 Ge12 | 2.7464(10) | Ge29 Ge30 | 2.7191(10) |
| Ge11 Ge16 | 2.5734(10) | Ge29 Ge34 | 2.5780(10) |
| Ge11 Ge17 | 2.6332(10) | Ge29 Ge35 | 2.6912(11) |
| Ge12 Ge13 | 2.9242(9)  | Ge30 Ge35 | 2.6591(11) |
| Ge12 Ge17 | 2.7466(10) | Ge30 Ge36 | 2.5770(10) |
| Ge12 Ge18 | 2.5600(10) | Ge31 Ge32 | 2.7185(10) |
| Ge13 Ge14 | 2.7322(10) | Ge31 Ge33 | 2.6915(10) |
| Ge13 Ge15 | 2.7455(10) | Ge31 Ge36 | 2.5702(10) |
| Ge13 Ge18 | 2.5708(10) | Ge32 Ge33 | 2.7033(10) |
| Ge14 Ge15 | 2.6435(11) | Ge32 Ge34 | 2.5632(11) |
| Ge14 Ge16 | 2.5644(10) | Ge33 Ge34 | 2.5262(11) |
| Ge15 Ge16 | 2.5426(11) | Ge33 Ge36 | 2.5256(9)  |
| Ge15 Ge18 | 2.5305(9)  | Ge34 Ge35 | 2.5265(9)  |
| Ge16 Ge17 | 2.5329(9)  | Ge35 Ge36 | 2.5252(11) |
| Ge17 Ge18 | 2.5235(10) |           |            |
| Ge16 Si9  | 2.378(2)   | Ge34 Si25 | 2.373(2)   |
| Ge18 Si13 | 2.392(2)   | Ge36 Si29 | 2.389(2)   |

Table S3: Selected bond lengths of  $(\text{NH}_3)_3\text{Zn-Ge}_9\text{-Zn}(\text{NH}_3)_3 \cdot 11 \text{NH}_3$  (**2**).

|         |            |         |           |
|---------|------------|---------|-----------|
| Ge1 Ge2 | 2.5979(17) | Ge4 Zn2 | 2.441(2)  |
| Ge1 Ge3 | 2.5973(17) | Ge6 Zn1 | 2.423(2)  |
| Ge2 Ge3 | 2.6794(16) | Zn1 N1  | 2.104(11) |
| Ge2 Ge5 | 2.6387(17) | Zn1 N2  | 2.058(8)  |
| Ge2 Ge6 | 2.5793(17) | Zn2 N3  | 2.061(12) |
| Ge3 Ge4 | 2.5783(18) |         |           |
| Ge3 Ge5 | 2.6305(17) |         |           |
| Ge4 Ge3 | 2.5782(18) |         |           |
| Ge4 Ge5 | 2.5497(15) |         |           |
| Ge5 Ge6 | 2.5481(15) |         |           |

## 6. Mixed Supporting Information of Compound **2**

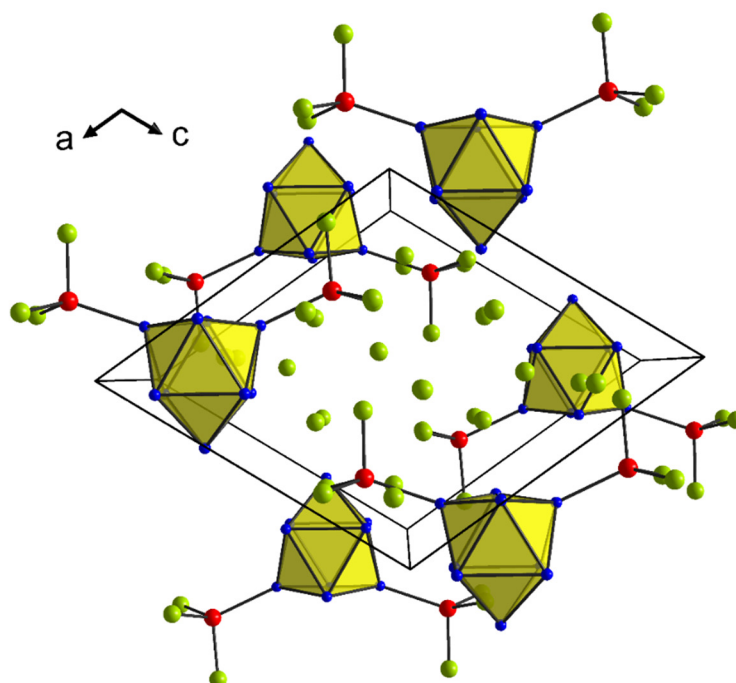

Figure S11: Extended unit cell of compound **2**. Ge atoms in blue, Zn atoms in red, N atoms in green. Ge clusters are shown as yellow polyhedra.

Table S4: Products from reactions of  $\text{K}_4\text{Ge}_9$  with  $\text{Zn}_2[\text{HC}(\text{Ph}_2\text{P}=\text{NPh})_2]_2$  in liquid ammonia, with different applied reactant ratios. m = main product, b = by-product.<sup>9, 10</sup>

| $\text{K}_4\text{Ge}_9:\text{Zn}_2[\text{HC}(\text{Ph}_2\text{P}=\text{NPh})_2]_2$ |                                                      |                                                      |                                         |
|------------------------------------------------------------------------------------|------------------------------------------------------|------------------------------------------------------|-----------------------------------------|
| 1:4                                                                                | 1:2                                                  | 1:1                                                  | 2:1                                     |
| $(\text{NH}_3)_3\text{Zn-Ge}_9\text{-Zn}(\text{NH}_3)_3$ (m)                       | $[\text{Ge}_9\text{-Zn-Zn-Ge}_9]^{6-}$ (m)           | $[\text{Ge}_9\text{Zn-ZnGe}_9]^{6-}$ (m)             | $[\text{Ge}_9\text{-Zn-Ge}_9]^{6-}$ (m) |
| $[\text{Ge}_9\text{-Zn-Ge}_9]^{6-}$ (b)                                            | $[\text{Ge}_9\text{Zn-Ge}_9\text{-ZnGe}_9]^{8-}$ (b) | $[\text{Ge}_9\text{Zn-Ge}_9\text{-ZnGe}_9]^{8-}$ (m) | $[\text{Ge}_9]^{4-/3-}$ (b)             |
| $[\text{Ge}_9\text{Zn-ZnGe}_9]^{6-}$ (b)                                           |                                                      |                                                      |                                         |
| Ge <sub>9</sub> Clusters in products                                               |                                                      |                                                      |                                         |
|                                                                                    |                                                      |                                                      |                                         |
| Zn atoms in products                                                               |                                                      |                                                      |                                         |

## References

1. O. Kysliak and A. Schnepf, *Dalton Trans.*, 2016, **45**, 2404-2408.
2. R. Blom, J. Boersma, P. H. M. Budzelaar, B. Fischer, A. Haaland, H. V. Volden and J. Weidlein, *Acta. Chem. Scand.*, 1986, **40**, 113 - 120.
3. S. Schulz, S. Gondzik, D. Schuchmann, U. Westphal, L. Dobrzycki, R. Boese and S. Harder, *Chem. Commun.*, 2010, **46**, 7757-7759.
4. MestreNova, Mestrelab Research, Version 12.0.2-20910, 2018.
5. G. M. Sheldrick, *Acta Cryst.*, 2015, **C71**, 3-8.
6. A. L. Spek, *Acta Cryst.*, 2015, **C71**, 9-18.
7. K. Brandenburg, Crystal Impact GbR, Bonn, Diamond Version 3.2k.
8. T. F. Fässler, *Coord. Chem. Rev.*, 2001, **215**, 347-377.
9. K. Mayer, L. A. Jantke, S. Schulz and T. F. Fässler, *Angew. Chem. Int. Ed.*, 2017, **56**, 2350-2355.
10. M. M. Bentlohner, L. A. Jantke, T. Henneberger, C. Fischer, K. Mayer, W. Klein and T. F. Fässler, *Chem. Eur. J.*, 2016, **22**, 13946-13952.
